# Supplementary figures and images for: Rhizosphere Bacterium Rhodococcus sp. P1Y Metabolizes Abscisic Acid to Form Dehydrovomifoliol
Source: MDPI journal article supplement (doi:10.3390/biom11030345), 2021-02-25

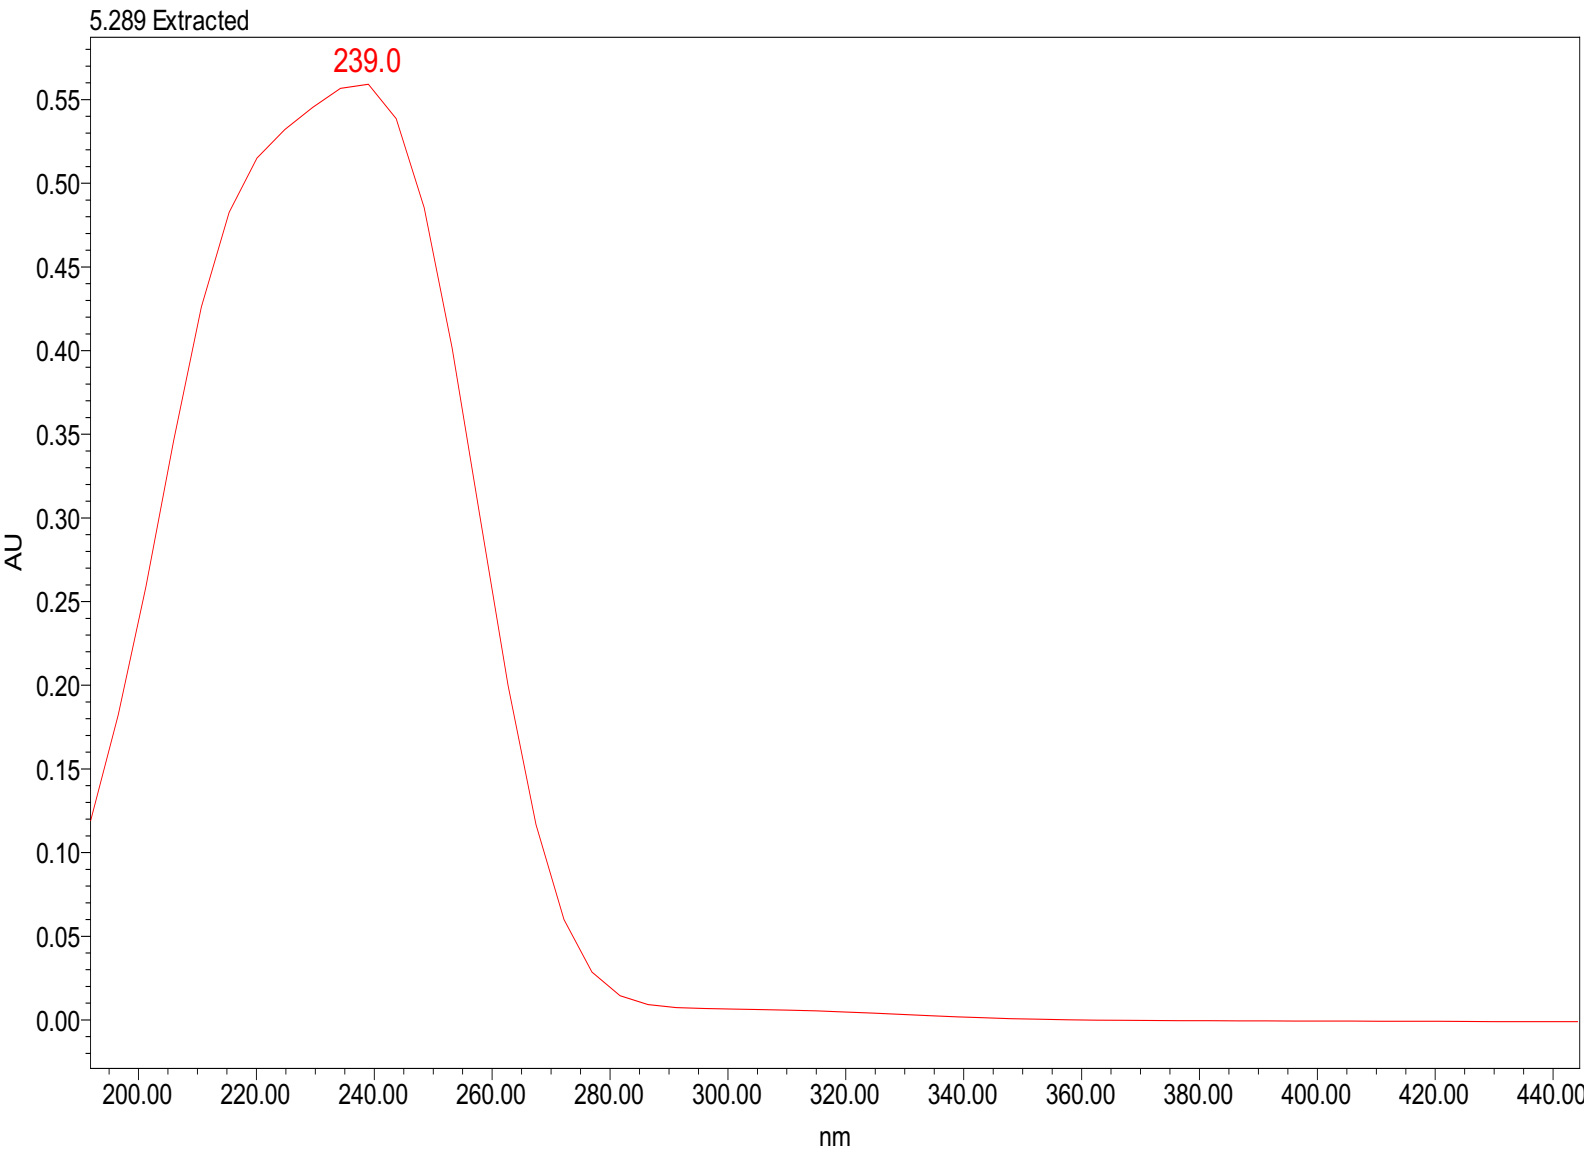

Supplement: s1 [file s1]
